# Supplementary figures and images for: Comparison of prognostic between partial and radical nephrectomy for T1b renal cell carcinoma: a propensity score ‐ matched SEER database analysis
Source: Research Square preprint supplement (doi:10.21203/rs.3.rs-6114752/v1), 2025-04-17

PS distribution by treatment

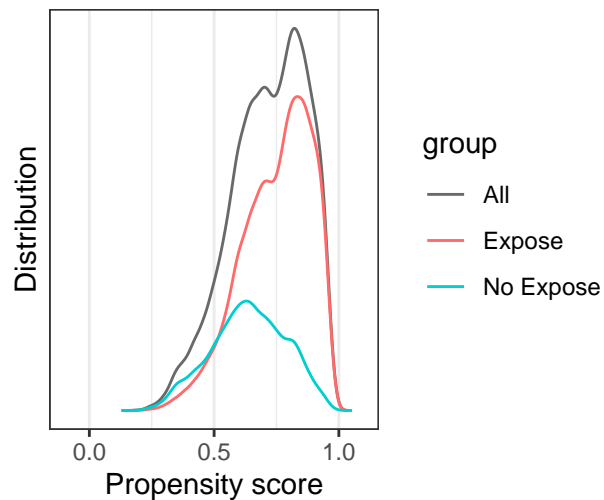

Matched Data

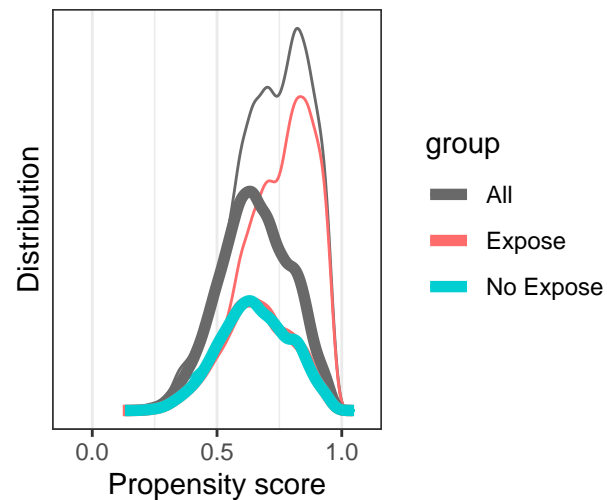

IPTW

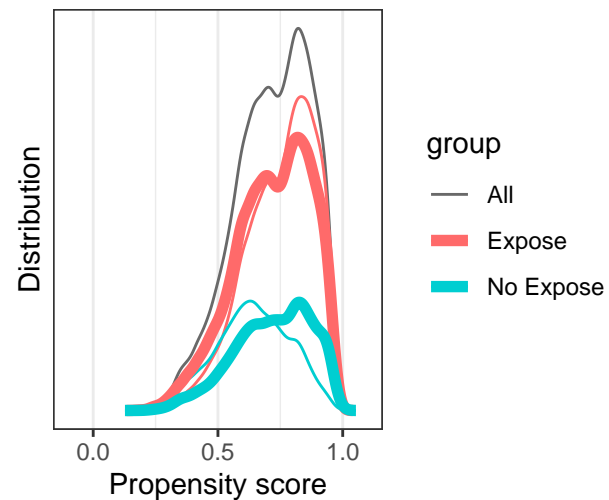

SMRW

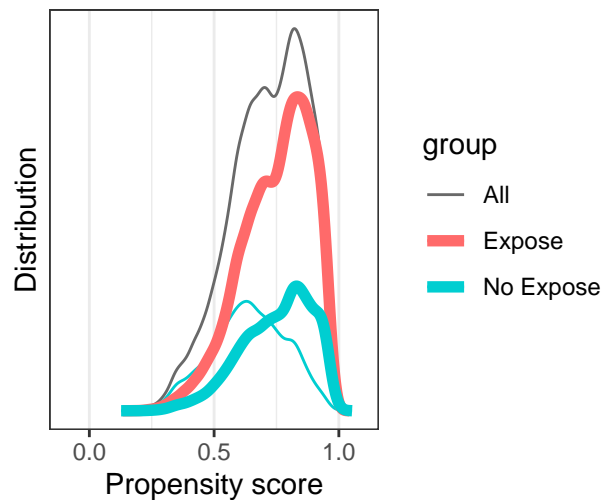

PA

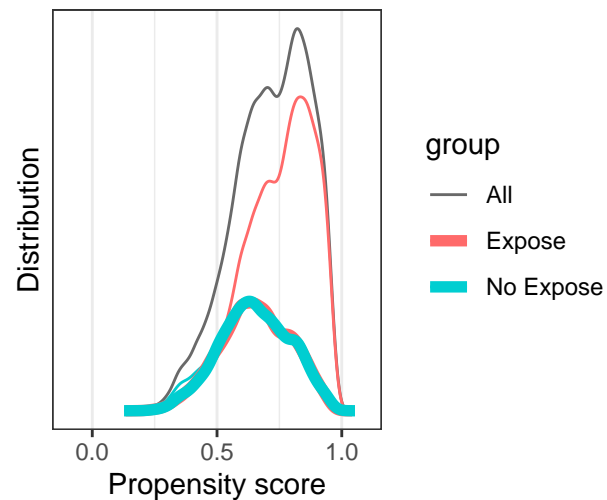

OW

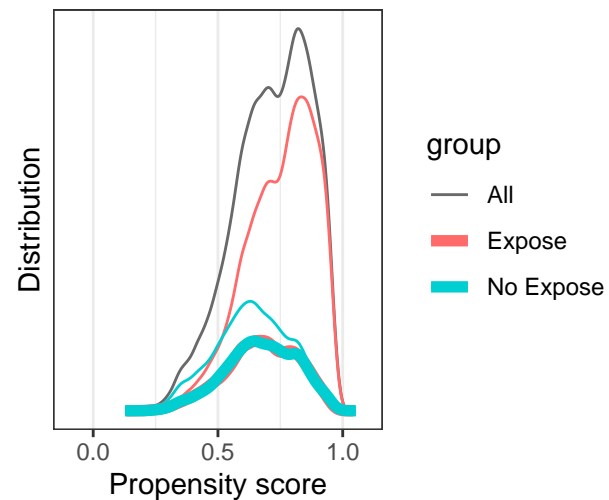

Supplement: Supplementary file 1 [file 3460802dcb07fbff7064434f.pdf]
